# Supplementary material for: Enhancement in performance of ternary blend-polymer solar cells using a PEDOT:PSS–graphene oxide hole transport layerviaFörster resonance energy transfer and balanced charge transport
Source: Royal Society of Chemistry journal article supplement (doi:10.1039/d0ma00532k), 2020-01-01
Supplement: d0ma00532k1.pdf [file d0ma00532k1.pdf]

## Supplementary Information

### **Enhancement in Performance of Ternary Blend-Polymer Solar Cells using PEDOT:PSS-Graphene Oxide Hole Transport Layer via Förster Resonance Energy Transfer and Balanced Charge Transport**

Lalsingh Guguloth<sup>a</sup>, Kuldeep Singh<sup>b</sup>, V S Reddy Channu<sup>c</sup> and Kusum Kumari<sup>\*a</sup>

<sup>a</sup> *Department of Physics, National Institute of Technology, Warangal - 506004, Telangana, India.*

<sup>b</sup> *CSIR-Central Electrochemical Research Institute, Chennai Unit, CSIR Madras Complex, Taramani, Chennai-600113, Tamilnadu, India.*

<sup>c</sup> *SMC Corporation, College Station, Texas, TX 77845, United States of America.*

<sup>\*</sup> *Corresponding author: Email: kusum@nitw.ac.in*

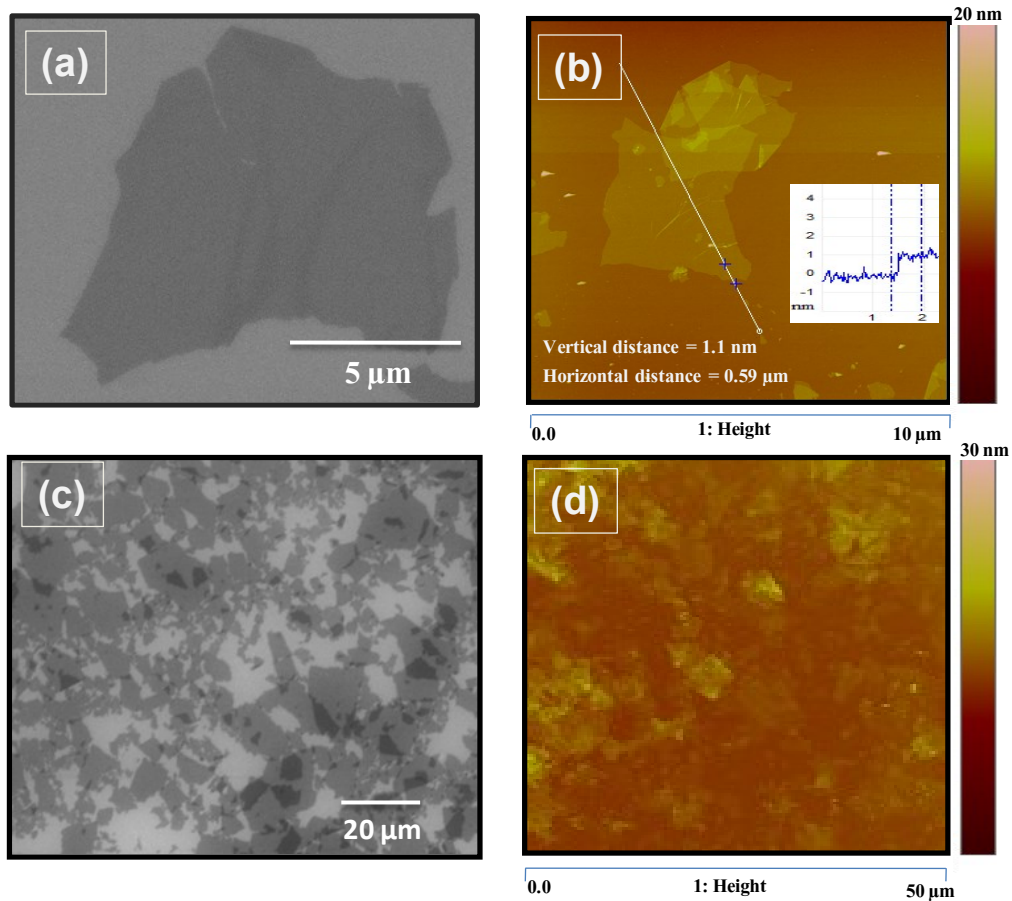

**Fig. S1. (a, b) FESEM and AFM image of GO Nanosheets on ITO substrate. The white line shows the height scan of the single GO nanosheets resulting in vertical distance ~ 1.1 nm within the marked portion. (c, d) FESEM and AFM image of PEDOT:PSS-GO (1:1) Nanosheets on ITO substrate.**

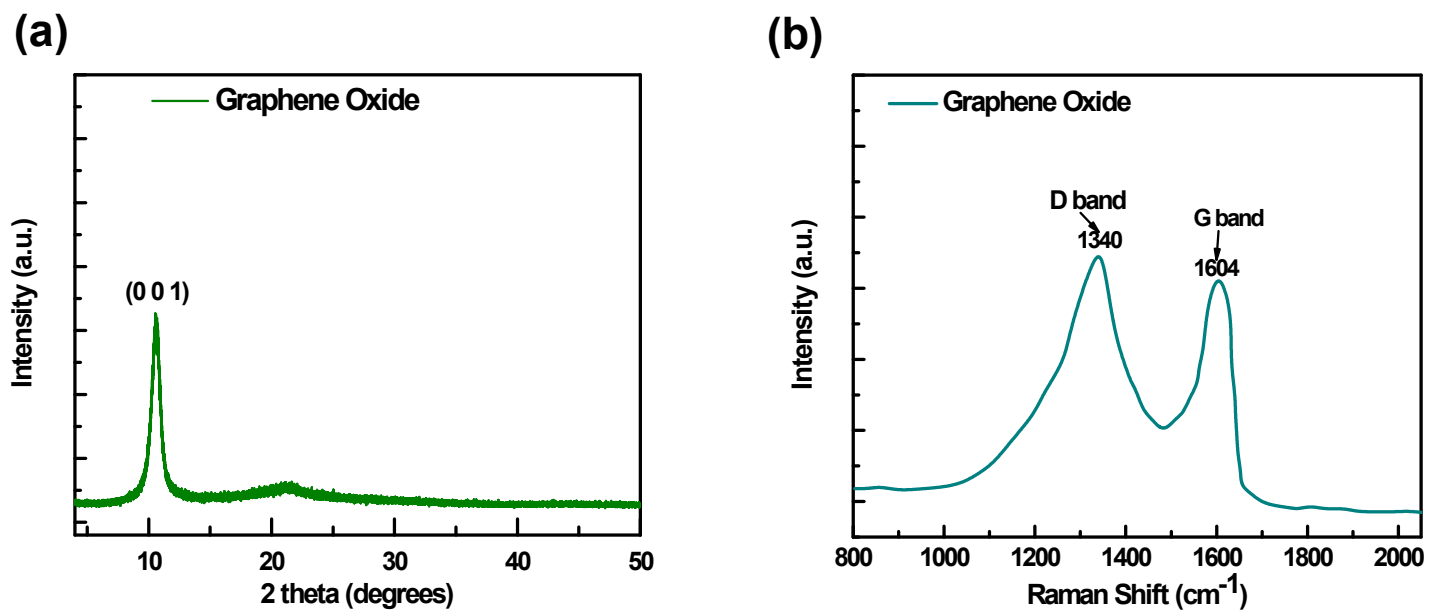

Fig. S2. (a) XRD spectra. (b) Raman Spectra of Graphene Oxide.

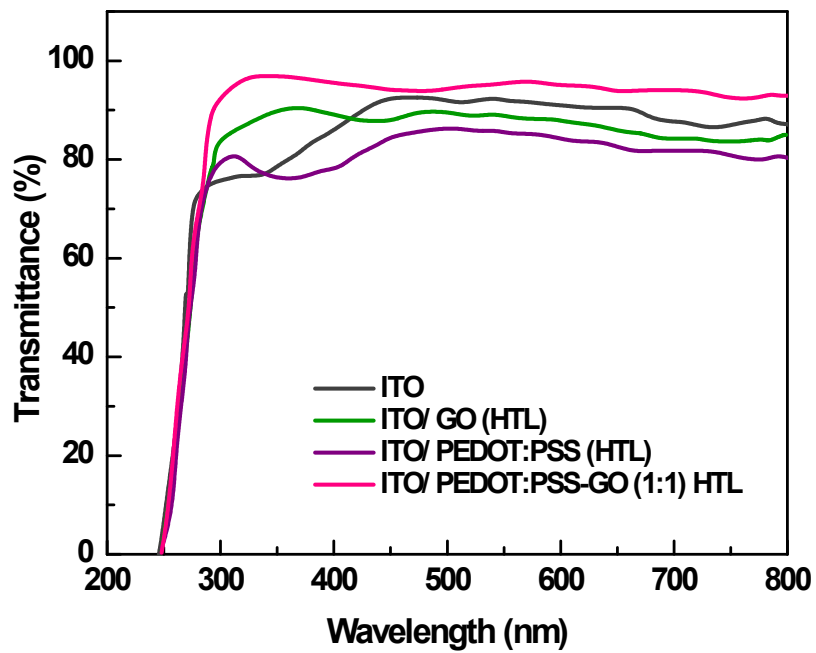

**Fig. S3.** (a) Transmittance spectra of GO,PEDOT:PSS, PEDOT:PSS-GO composite films in (1:1) weight ratio.

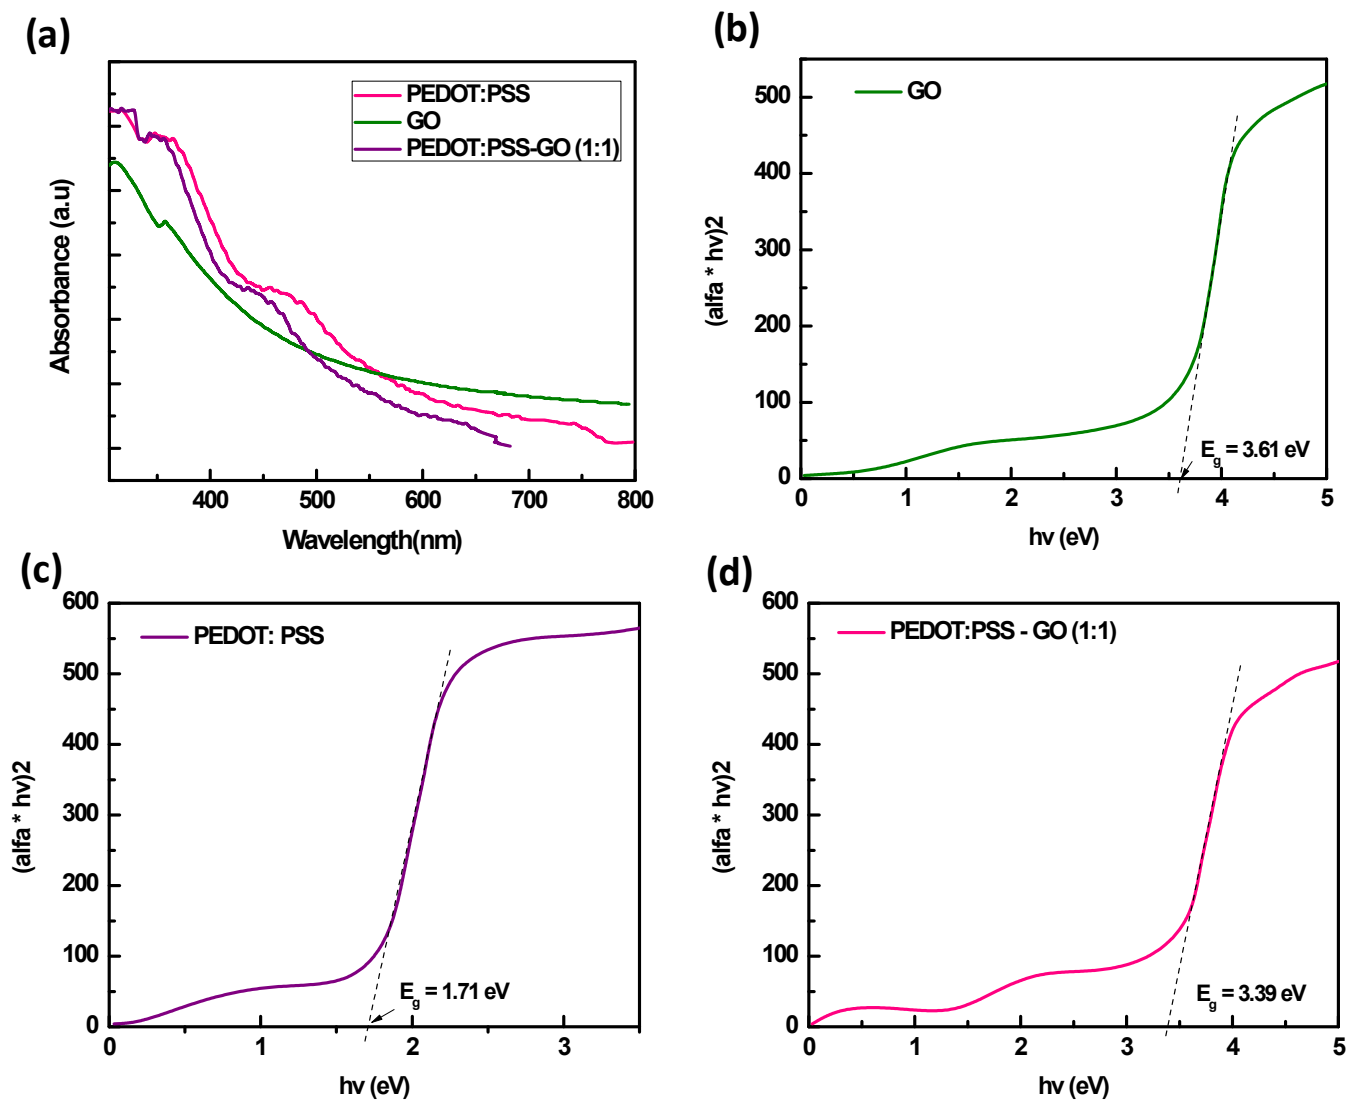

**Fig. S4.** (a) UV-Vis absorption spectra of GO, PEDOT:PSS, PEDOT:PSS-GO composite films in (1:1) weight ratio. (b-d) Tauc Plots to estimate the band gap ( $E_g$ ) of GO, PEDOT:PSS, PEDOT:PSS-GO (1:1) composite films, respectively.

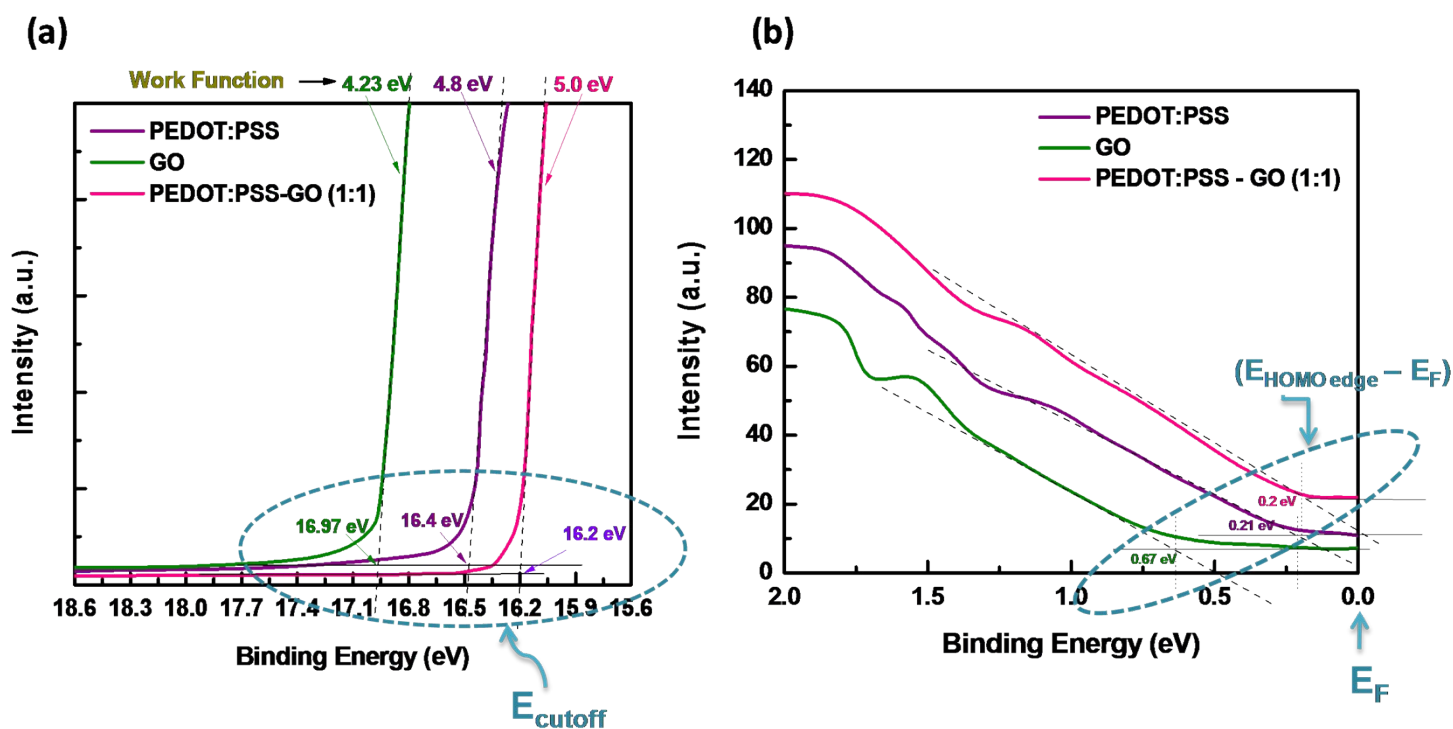

**Fig. S5.** The UPS measurements of GO, PEDOT:PSS and PEDOT:GO composite films (weight ratio of (1:1); (a) secondary electron cutoff regions and (b) Fermi edge (valence band edge) regions; Source ( $h\nu = 21.2$  eV).

| Sample             | $E_{\text{cutoff}}$ (eV) | $E_{\text{HOMO edge}} - E_F(0)$ (eV) | $\Phi$ (eV) | $E_{\text{HOMO}}$ (eV) | $E_{\text{LUMO}}$ (eV) | $E_g$ (eV) |
|--------------------|--------------------------|--------------------------------------|-------------|------------------------|------------------------|------------|
| PEDOT:PSS          | 16.4                     | 0.21                                 | 4.8         | 5.01                   | 3.3                    | 1.71       |
| GO                 | 16.97                    | 0.67                                 | 4.23        | 4.9                    | 1.3                    | 3.61       |
| PEDOT:PSS-GO (1:1) | 16.2                     | 0.22                                 | 5.0         | 5.22                   | 1.83                   | 3.39       |

**Table S1.**  $E_{\text{cutoff}}$ , Work function( $\phi$ ),  $E_{\text{HOMO}}$  and  $E_{\text{LUMO}}$ ,  $E_g$  determined from UPS analysis.

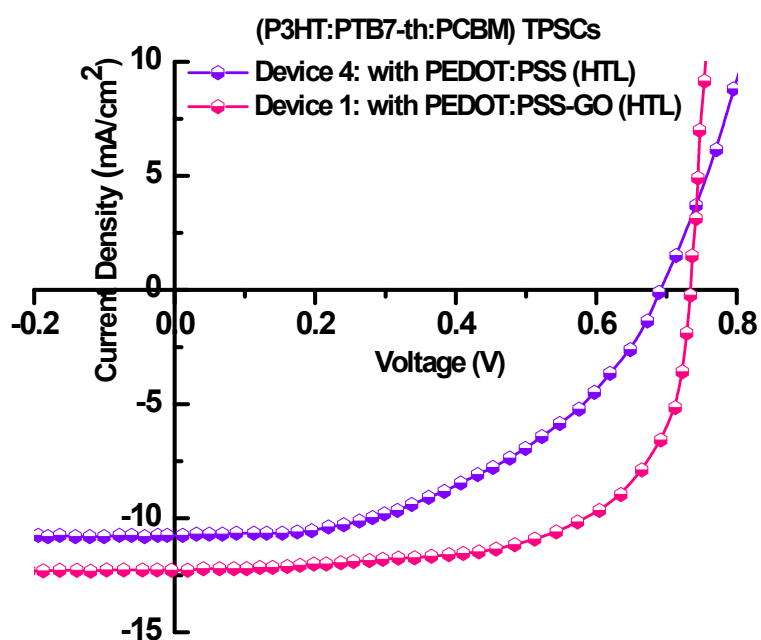

**Fig. S6.** *J-V* characteristics of TPSC Device 1: ITO/ PEDOT:PSS-GO(1:1)/ P3HT:PTB7-Th:PCBM (0.3:0.7:1)/ LiF/Al, and TPSC Device 4: ITO/ PEDOT:PSS/ P3HT:PTB7-Th:PCBM (0.3:0.7:1)/ LiF/Al, under Air Mass 1.5 Solar illumination ( $P_{in} = 100 \text{ mW/cm}^2$ ).

| Device Parameters                  | Device 4<br>(with PEDOT:PSS HTL) | Device 1<br>(with PEDOT:PSS-GO HTL) |
|------------------------------------|----------------------------------|-------------------------------------|
| $J_{sc}$ (mA/cm <sup>2</sup> )     | 10.7                             | 12.3                                |
| $V_{oc}$ (V)                       | 0.69                             | 0.74                                |
| FF                                 | 0.43                             | 0.78                                |
| PCE (%)                            | 3.2                              | 7.1                                 |
| $R_s$ ( $\Omega \text{ cm}^2$ )    | 17                               | 5                                   |
| $R_{sh}$ ( $\Omega \text{ cm}^2$ ) | 977                              | 4111                                |

**Table S2:** Photovoltaic parameters for TPSCs: Device 1 and Device 4.
